# Supplementary material
Source: Springer Nature journal article supplement (https://www.springermedizin.de/resource/supplementary/13002_2012_294_MOESM1_ESM.pdf/9627578)

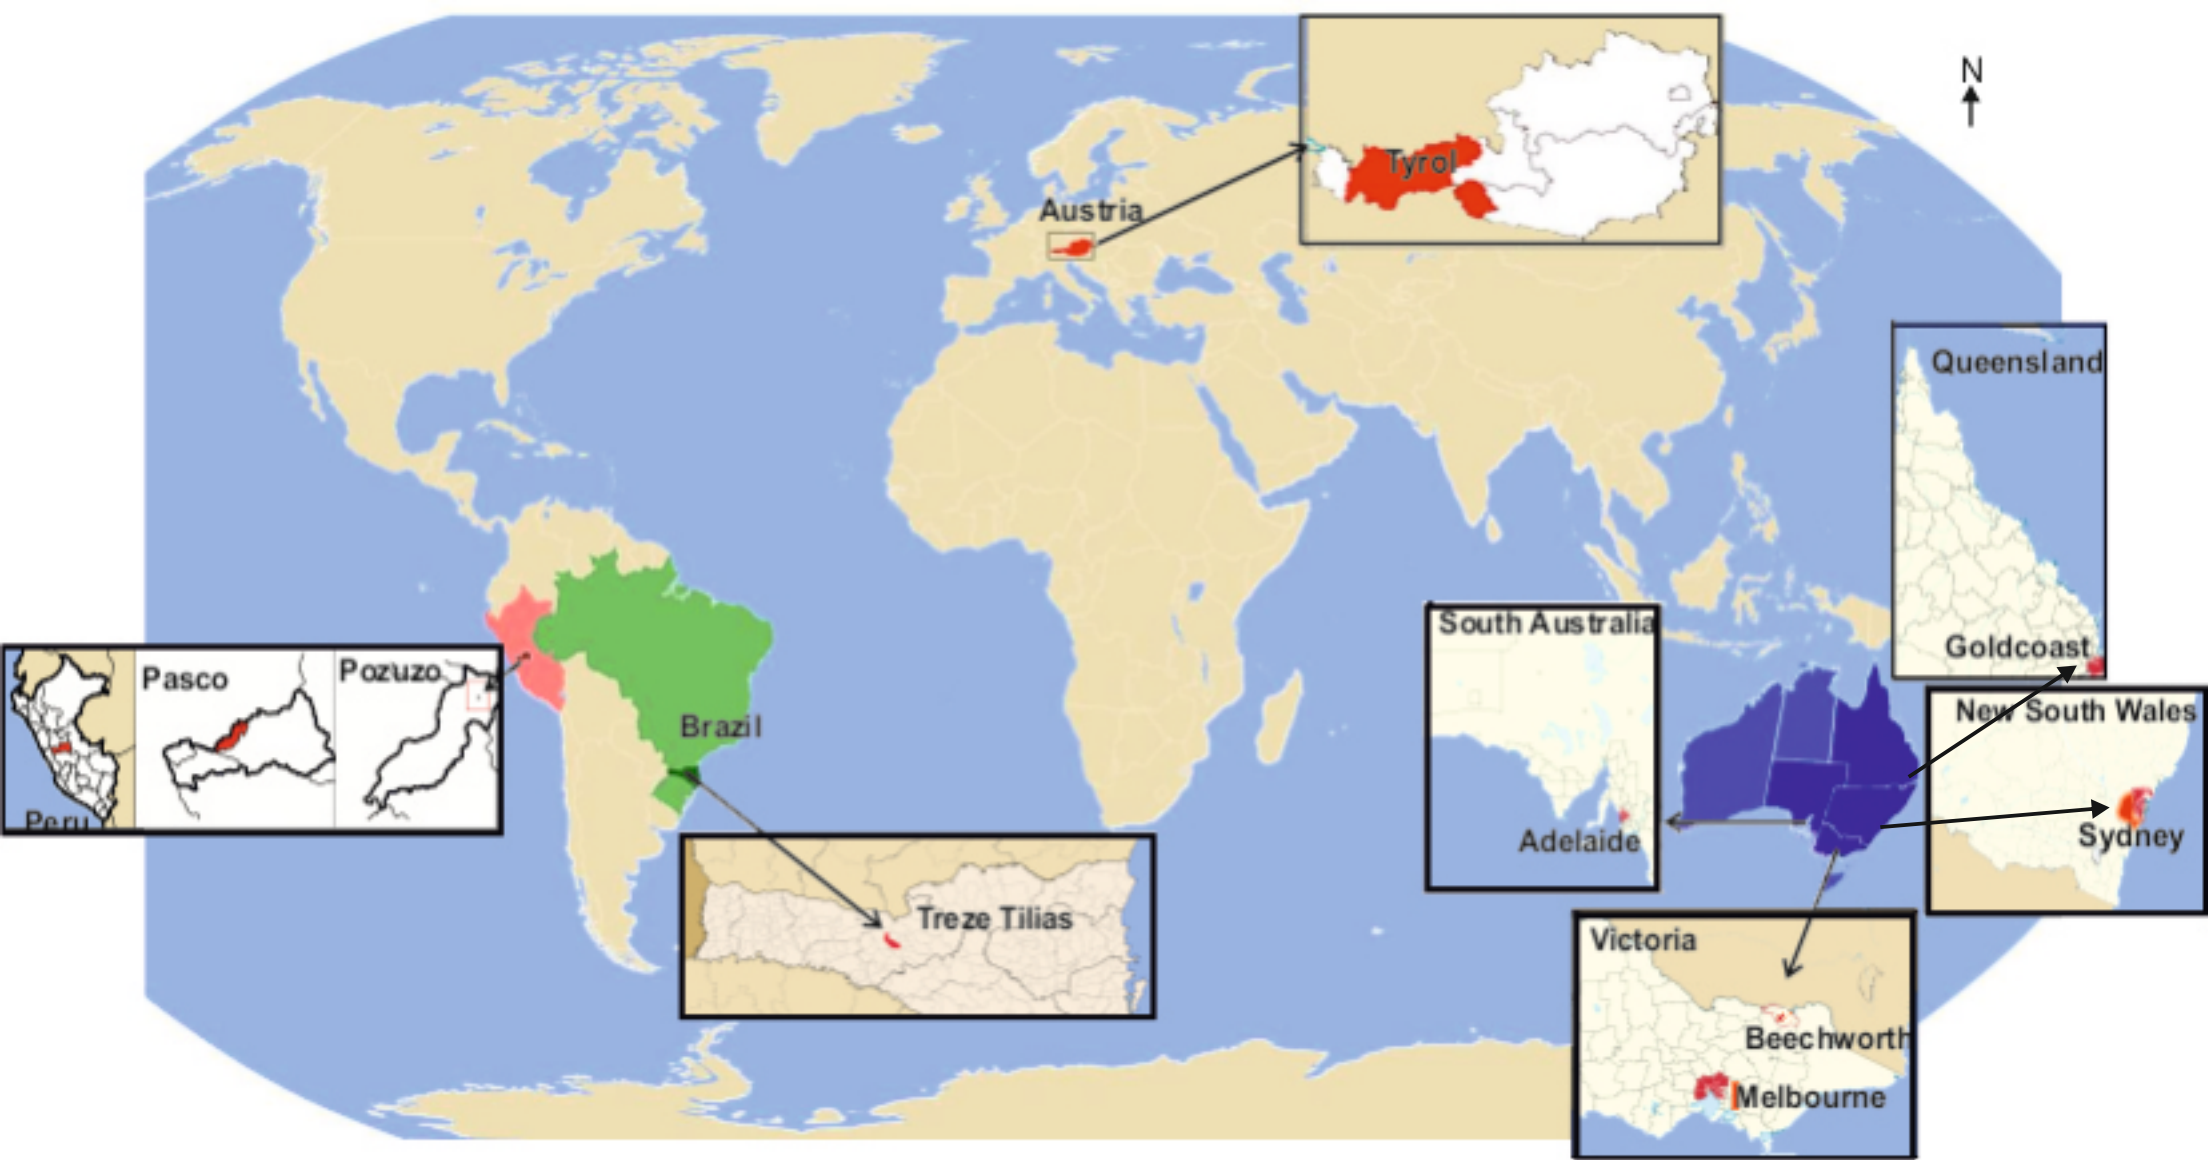

Supplement: MOESM1 [file 9627578]
